# Supplementary material for: Making clinical trials more relevant: improving and validating the PRECIS tool for matching trial design decisions to trial purpose
Source: PubMed Central journal article supplement (PMC3748822; doi:10.1186/1745-6215-14-115), 2013-04-27

## Additional materials 1

### PRECIS - Pragmatic-Explanatory Continuum Indicator Summary [10]

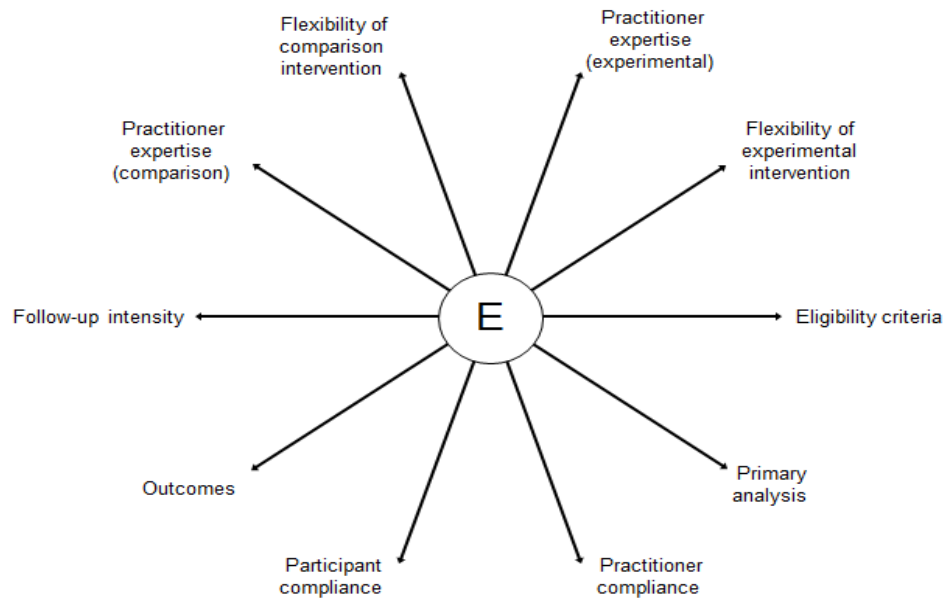

Supplement: 1745-6215-14-115-S1.pdf [file 1745-6215-14-115-S1.pdf]
